# Supplementary material
Source: publisher figshare collection journal article supplement (https://gsajournals.figshare.com/ndownloader/files/28383564)
Supplement: Supplementary file 1 [file 28383564]

## Sheet: Sheet1
Data type	Experimental species	Symbol/name used in publication	Source – public	Source – published	Source – unpublished	Identifiers	New reagent	Comments
Data type (mandatory) Duplicate rows as needed. Order is flexible, but row titles must be preserved.	Experimental species (mandatory, "NA" okay)	Symbol/name used in publication (mandatory)	Source – public [stock center; company, data repository] (one of D,E,F mandatory)	Source -- published [PMID or 'this paper'] (one of D,E,F mandatory)	Source – unpublished [description, incl. lab of origin] (one of D,E,F mandatory)	Identifiers [format as ID_source:identifier] Separate multiple entries with semi-colon, space	New reagent (mandatory for new entities) Description, progenitor(s)	Comments (optional) Genotypes, purpose of reagent, additional information
gene (source not applicable)			NA	NA	NA
strain, strain_background	W303 RAD5+ tor1-1::HIS3, fpr1::NatMX4, RPL13A-2xFKBP12::TRP1, CDC9-FRB::HygMX	yeast		PMID: 30541106
genetic reagent (in whole organism)	S. cerevisiae	yeast		PMID: 30541106
cell line
transfected construct (in cell line)
antibody
recombinant DNA reagent
sequence-based reagent
peptide, recombinant protein
large-scale dataset
commercial assay	NA
chemical compound, drug	NA	rapamycin, rap	Spectrum, 41810000-2
chemical compound, drug	NA	alpha-factor	Biomatik, custom order: WHWLQLKPGQPMY
chemical compound, drug	NA	RNase A	Fisher, 50-153-8126
chemical compound, drug	NA	sodium citrate	Sigma, S4641
chemical compound, drug	NA	proteinase K	MP biomedicals, 219350480
chemical compound, drug	NA	SYTOX green	Fisher, S7020
chemical compound, drug	NA	Source 15Q columns	VWR, 89128-854
software, algorithm	NA
other
